# Supplementary material for: Insight into the hydration friction of lipid bilayers
Source: Royal Society of Chemistry journal article supplement (doi:10.1039/d3nr05517e), 2024-01-01
Supplement: d3nr05517e1.pdf [file d3nr05517e1.pdf]

Supplementary information

## **Insight into the hydration friction of lipid bilayers**

Xiaoxue Qin,<sup>a</sup> Mingdong Dong,<sup>\*b</sup> and Qiang Li<sup>\*a</sup>

<sup>a</sup>Key Laboratory of Colloid and Interface Chemistry of the Ministry of Education,  
School of Chemistry and Chemical Engineering, Shandong University, Shandong,  
Jinan 250100, China. E-mail: qiang@sdu.edu.cn

<sup>b</sup>Interdisciplinary Nanoscience Center (iNANO), Aarhus University, Aarhus C, DK-  
8000, Denmark. E-mail: dong@inano.au.dk

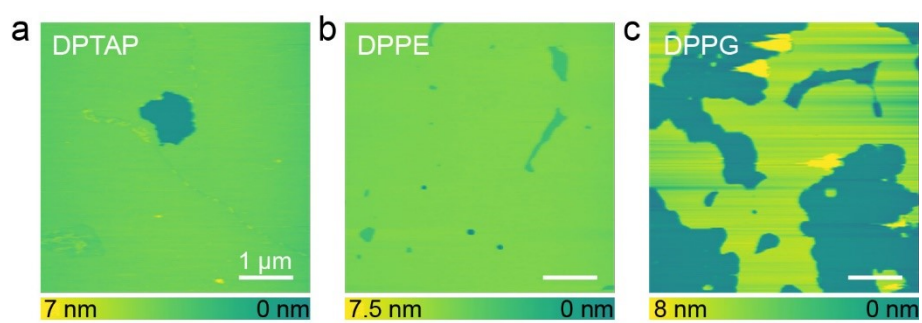

**Fig. S1** Large continuous structures of lipid bilayers supported on mica. (a) DPTAP, (b) DPPE, and (c) DPPG.

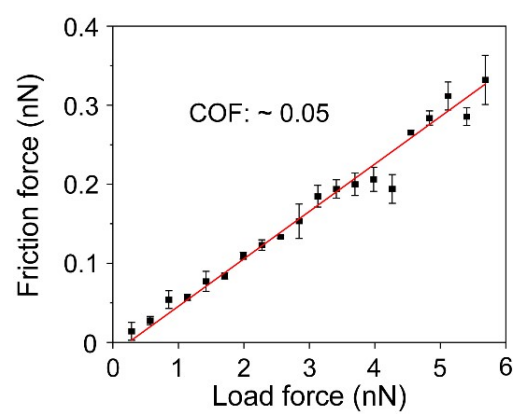

**Fig. S2** Friction *versus* normal load curve of the bare mica.

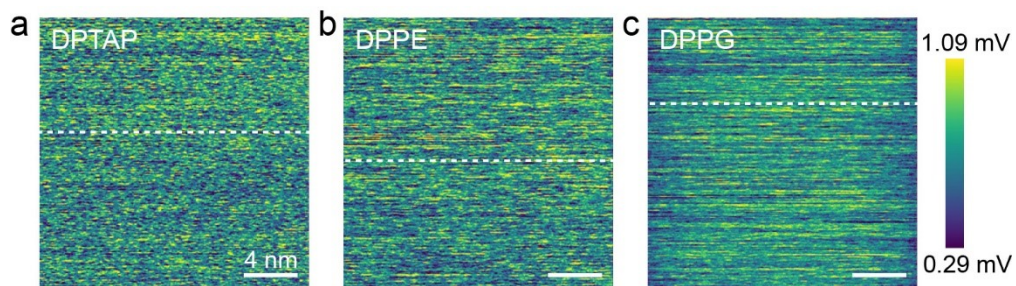

**Fig. S3** Friction images of lipid bilayers. (a) DPTAP, (b) DPPE, and (c) DPPG. The friction loops shown in Fig. 2c in the main text were extracted along the white dashed lines marked on the friction images.

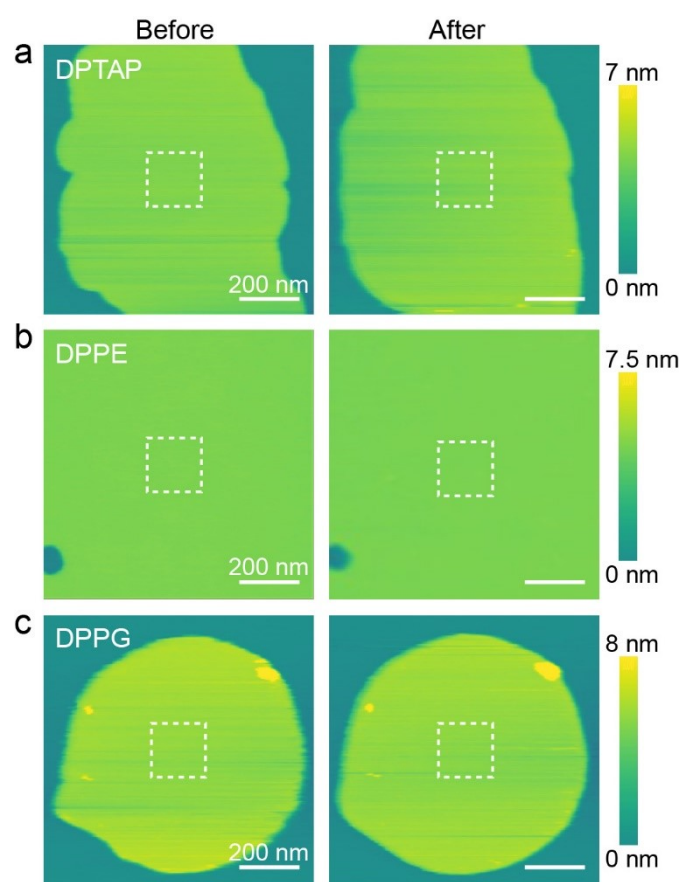

**Fig. S4** AFM height images before and after friction testing to ensure the lipid bilayers were not destroyed during friction measurement. (a) DPTAP bilayer, (b) DPPE bilayer, and (c) DPPG bilayer.

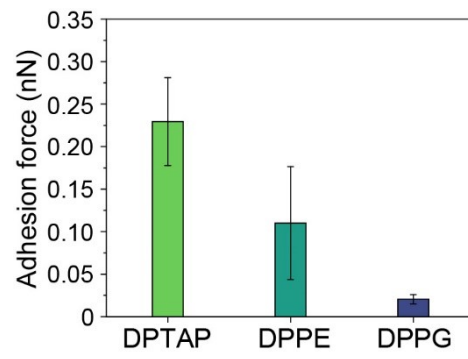

**Fig. S5** The histogram of the adhesion force between the tip and lipid bilayers extracted from Fig. 3c in the main text.

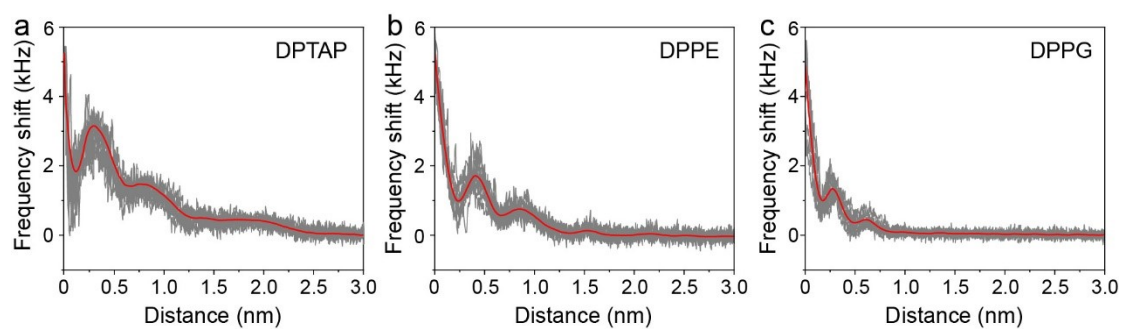

**Fig. S6** The averaged  $\Delta f$  versus distance curves for (a) DPTAP bilayer, (b) DPPE bilayer, and (c) DPPG bilayer.

**Table S1** Relevant distances extracted from force-distance curves

|       | $d_0$ (nm)       | $d_1$ (nm)       |
|-------|------------------|------------------|
| DPTAP | $0.375 \pm 0.02$ | $0.596 \pm 0.03$ |
| DPPE  | $0.360 \pm 0.01$ | $0.475 \pm 0.02$ |
| DPPG  | $0.289 \pm 0.02$ | $0.334 \pm 0.02$ |
